# Supplementary material for: Integrated multiple analytes and semi-mechanistic population pharmacokinetic model of tusamitamab ravtansine, a DM4 anti-CEACAM5 antibody-drug conjugate
Source: PubMed Central journal article supplement (PMC9098589; doi:10.1007/s10928-021-09799-0), 2022-02-15

Integrated multiple analytes and semi-mechanistic population pharmacokinetic model of tusamitamab ravtansine, a DM4 anti-CEACAM5 antibody-drug conjugate

*Journal of Pharmacokinetics and Pharmacodynamics*

Clemence Pouzin, Leonid Gibiansky, Nathalie Fagniez, Michel Tod, Mustapha Chadjaa, Laurent Nguyen

Corresponding author: Clemence Pouzin, 1 Avenue Pierre Brossolette, 91380 Chilly-Mazarin, France. Email: [Clemence.Pouzin@sanofi.fr](mailto:Clemence.Pouzin@sanofi.fr)

Online Resource 3: GOF plots, observed data vs population and individual prediction

a. SAR408701

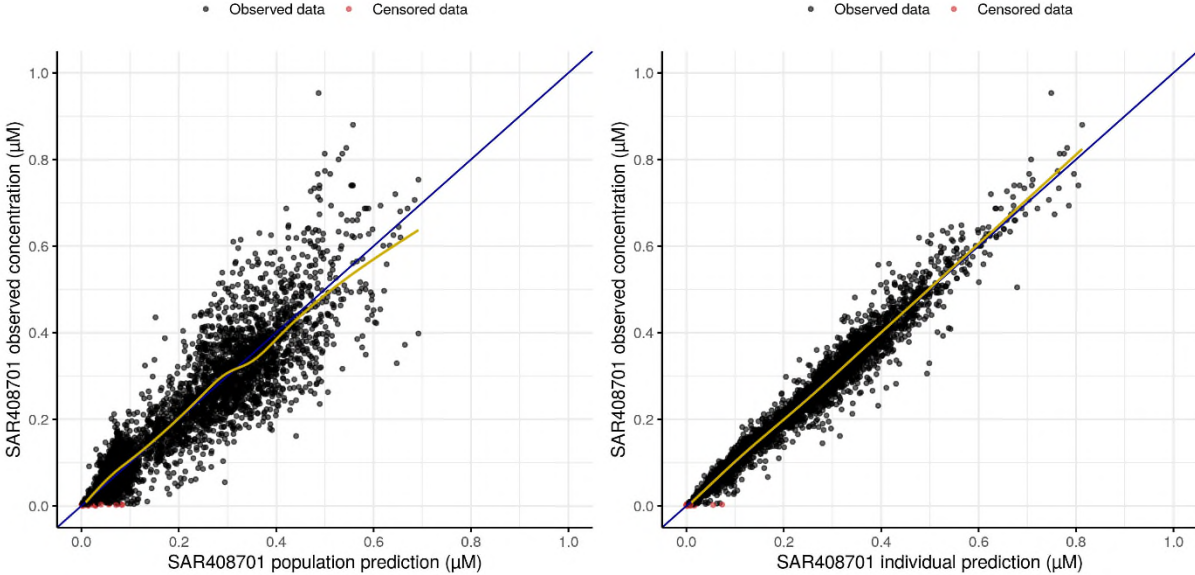

b. DM4

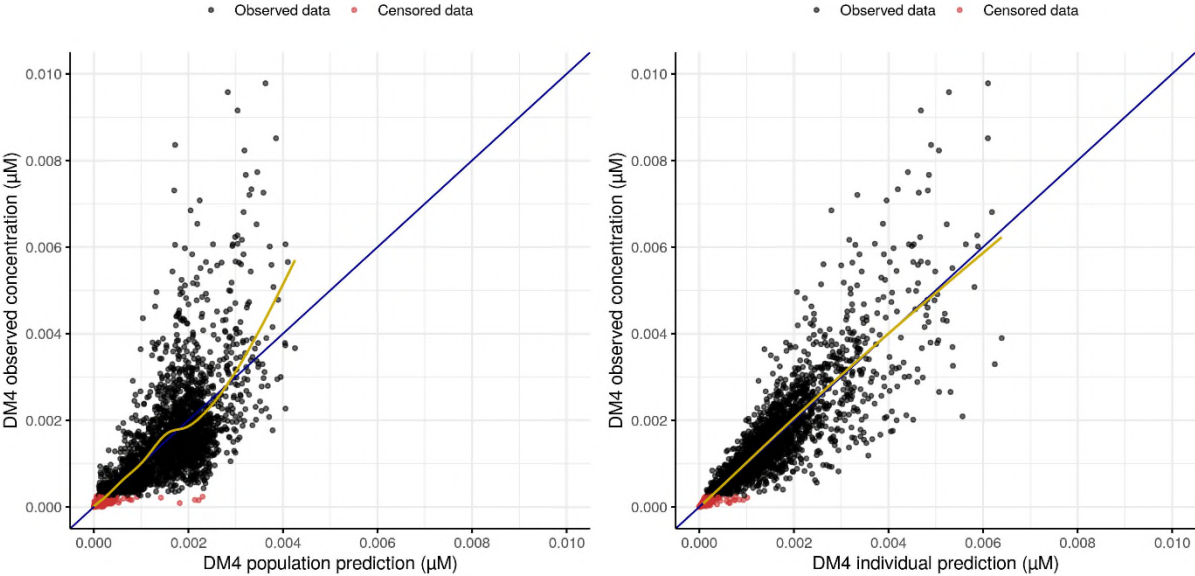

### c. MeDM4

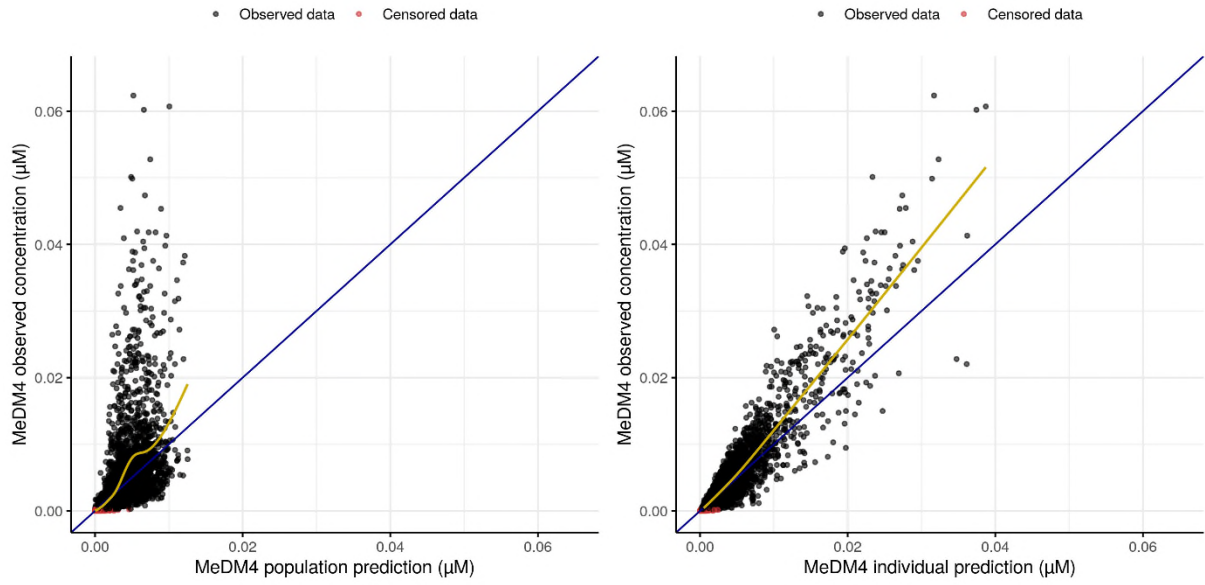

### d. NAB

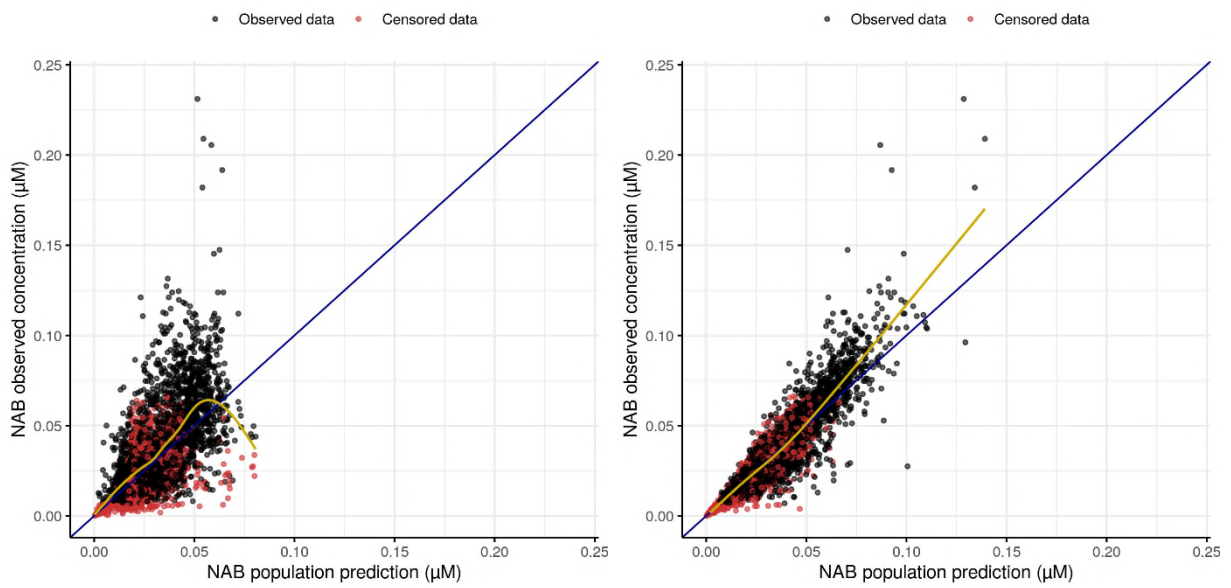

e. Average DAR

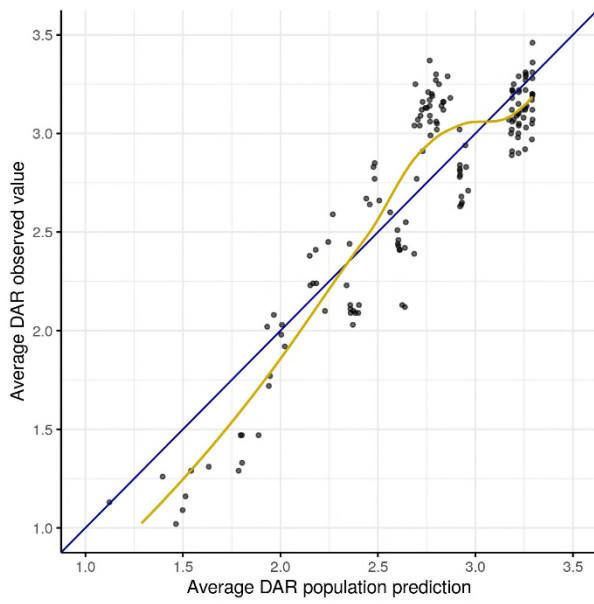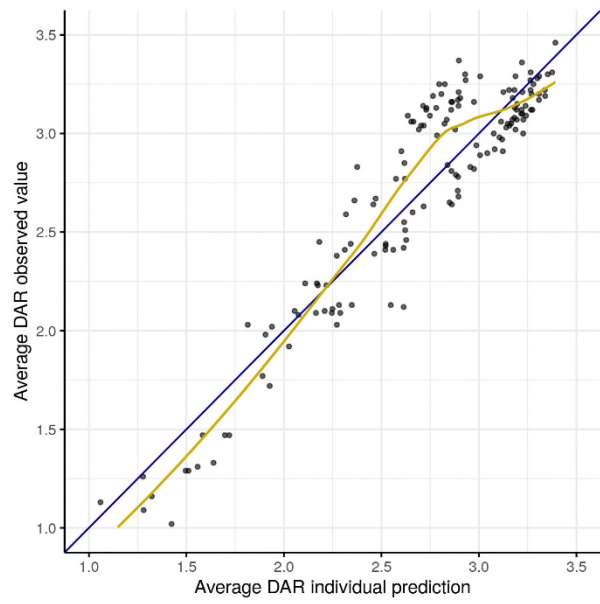

f. Proportions of individual DAR species: NAB (DAR0)

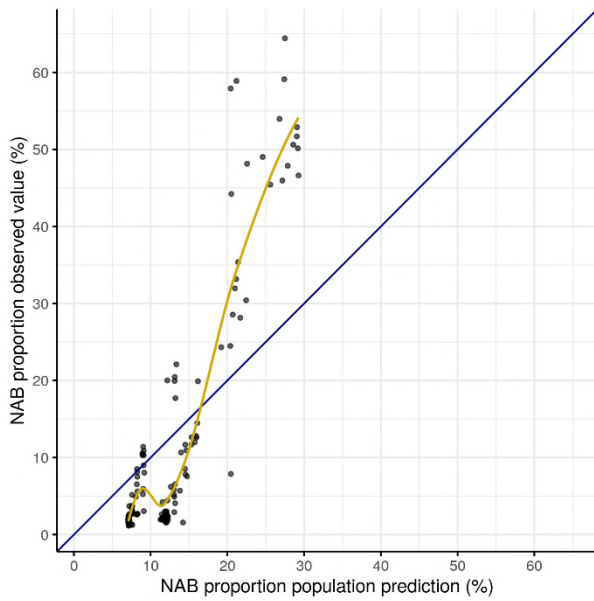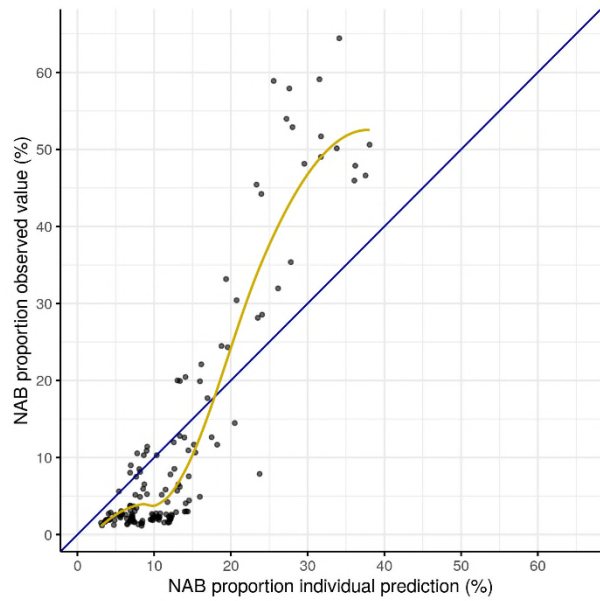

### g. Proportions of individual DAR species: DAR1

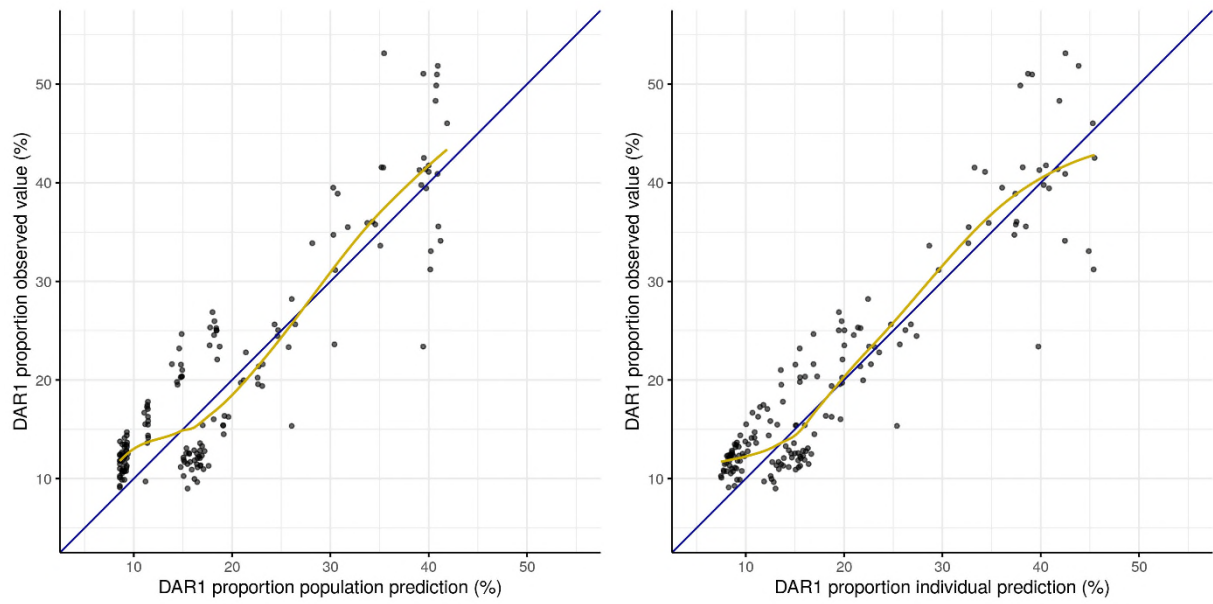

### h. Proportions of individual DAR species: DAR2

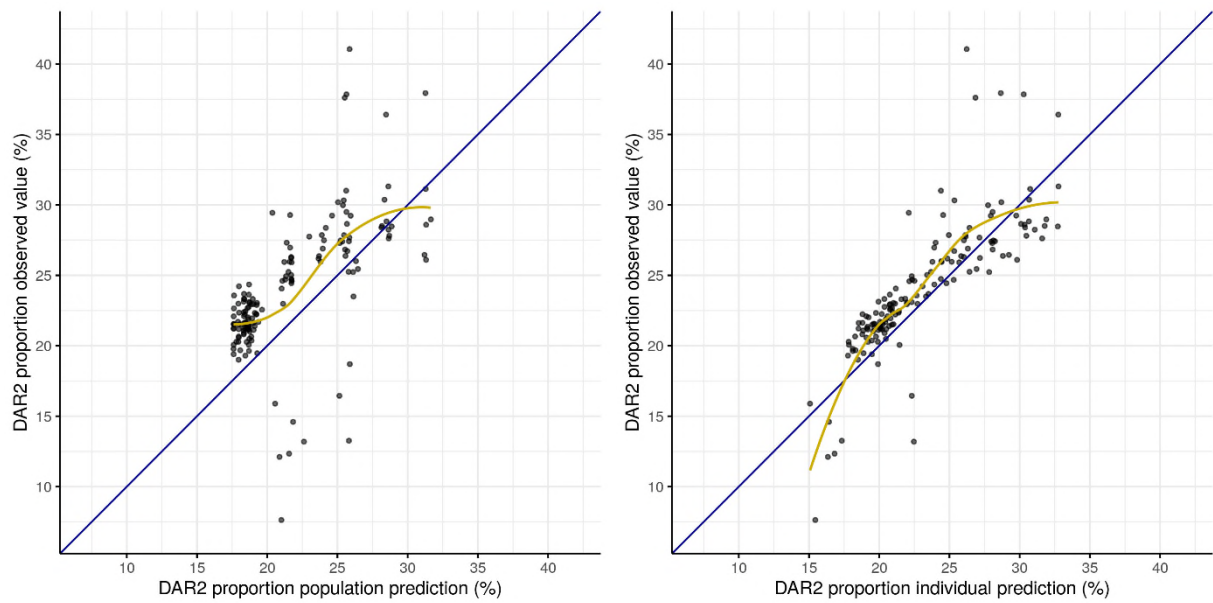

i. Proportions of individual DAR species: DAR3

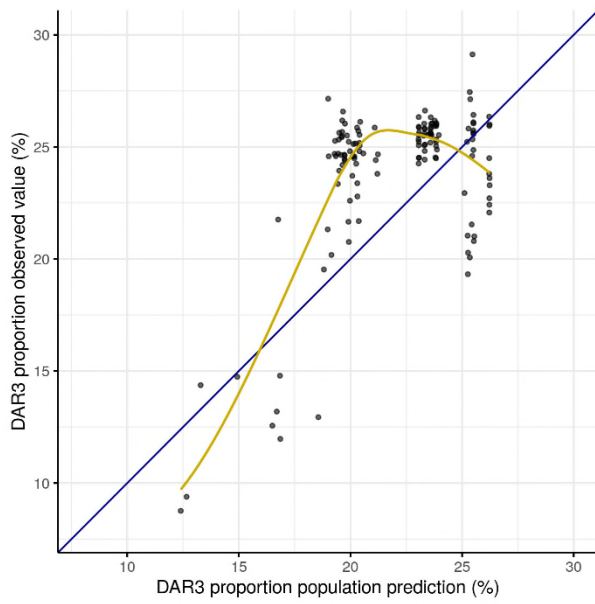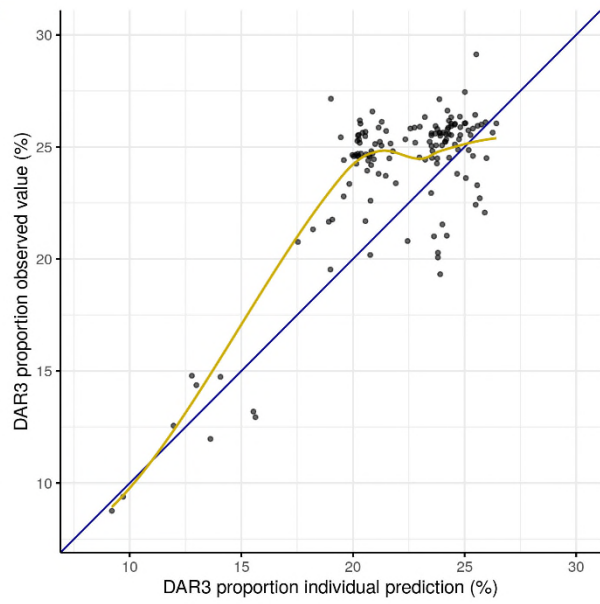

j. Proportions of individual DAR species: DAR4

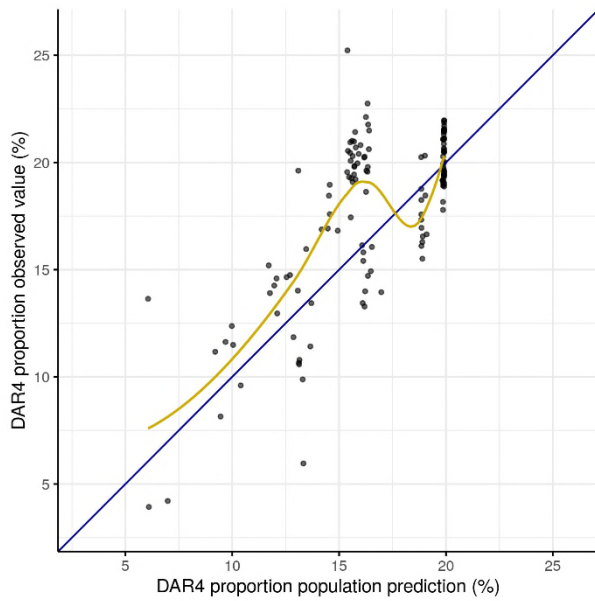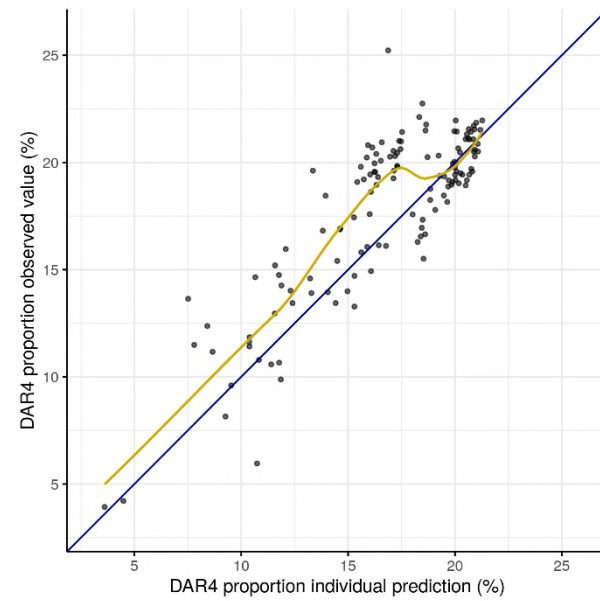

k. Proportions of individual DAR species: DAR5

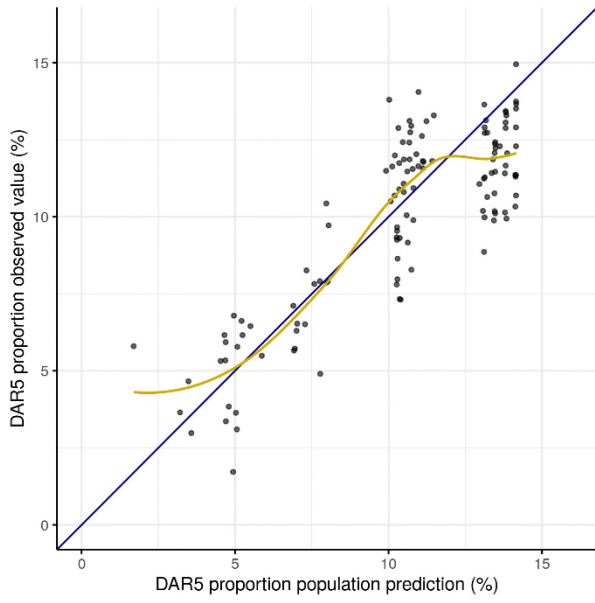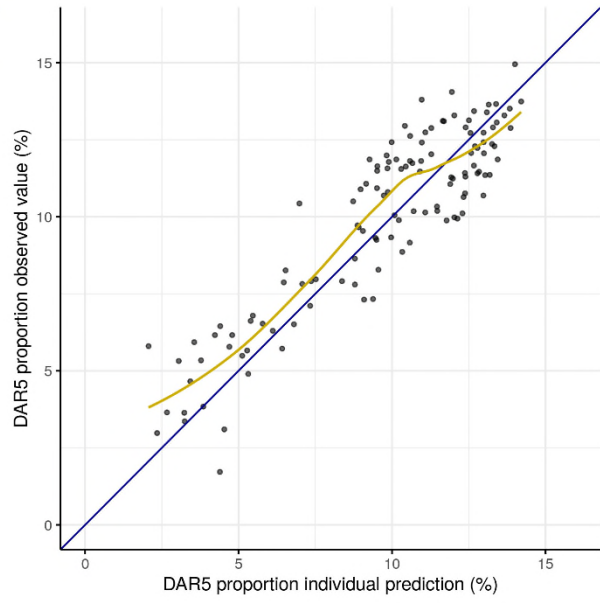

l. Proportions of individual DAR species: DAR6

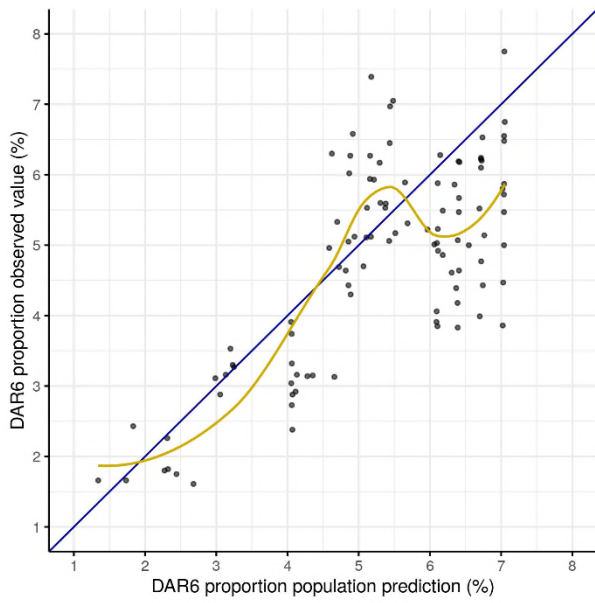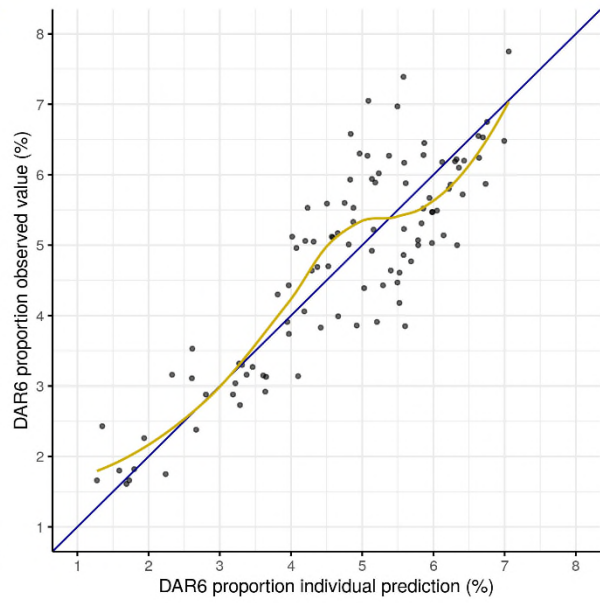

m. Proportions of individual DAR species: DAR7

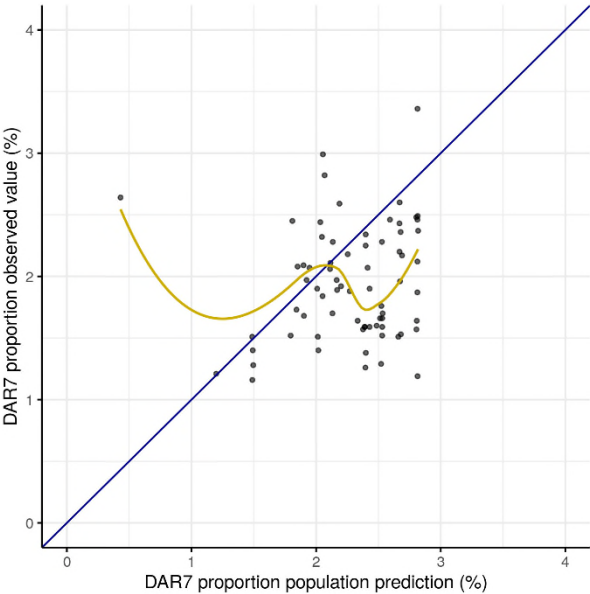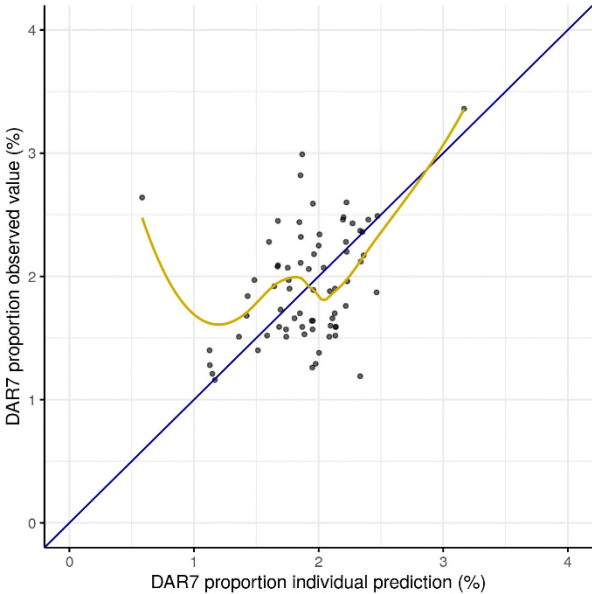

Supplement: 10928_2021_9799_MOESM3_ESM.pdf [file 10928_2021_9799_MOESM3_ESM.pdf]
