# Supplementary material for: Integrated multiple analytes and semi-mechanistic population pharmacokinetic model of tusamitamab ravtansine, a DM4 anti-CEACAM5 antibody-drug conjugate
Source: PubMed Central journal article supplement (PMC9098589; doi:10.1007/s10928-021-09799-0), 2022-02-15

Integrated multiple analytes and semi-mechanistic population pharmacokinetic model of tusamitamab ravtansine, a DM4 anti-CEACAM5 antibody-drug conjugate

*Journal of Pharmacokinetics and Pharmacodynamics*

Clemence Pouzin, Leonid Gibiansky, Nathalie Fagniez, Michel Tod, Mustapha Chadjaa, Laurent Nguyen

Corresponding author: Clemence Pouzin, 1 Avenue Pierre Brossolette, 91380 Chilly-Mazarin, France. Email: [Clemence.Pouzin@sanofi.fr](mailto:Clemence.Pouzin@sanofi.fr)

# Online Resource 4: GOF plots, PWRES, iWRES and NPDE vs time and predicted concentrations

## a. SAR408701

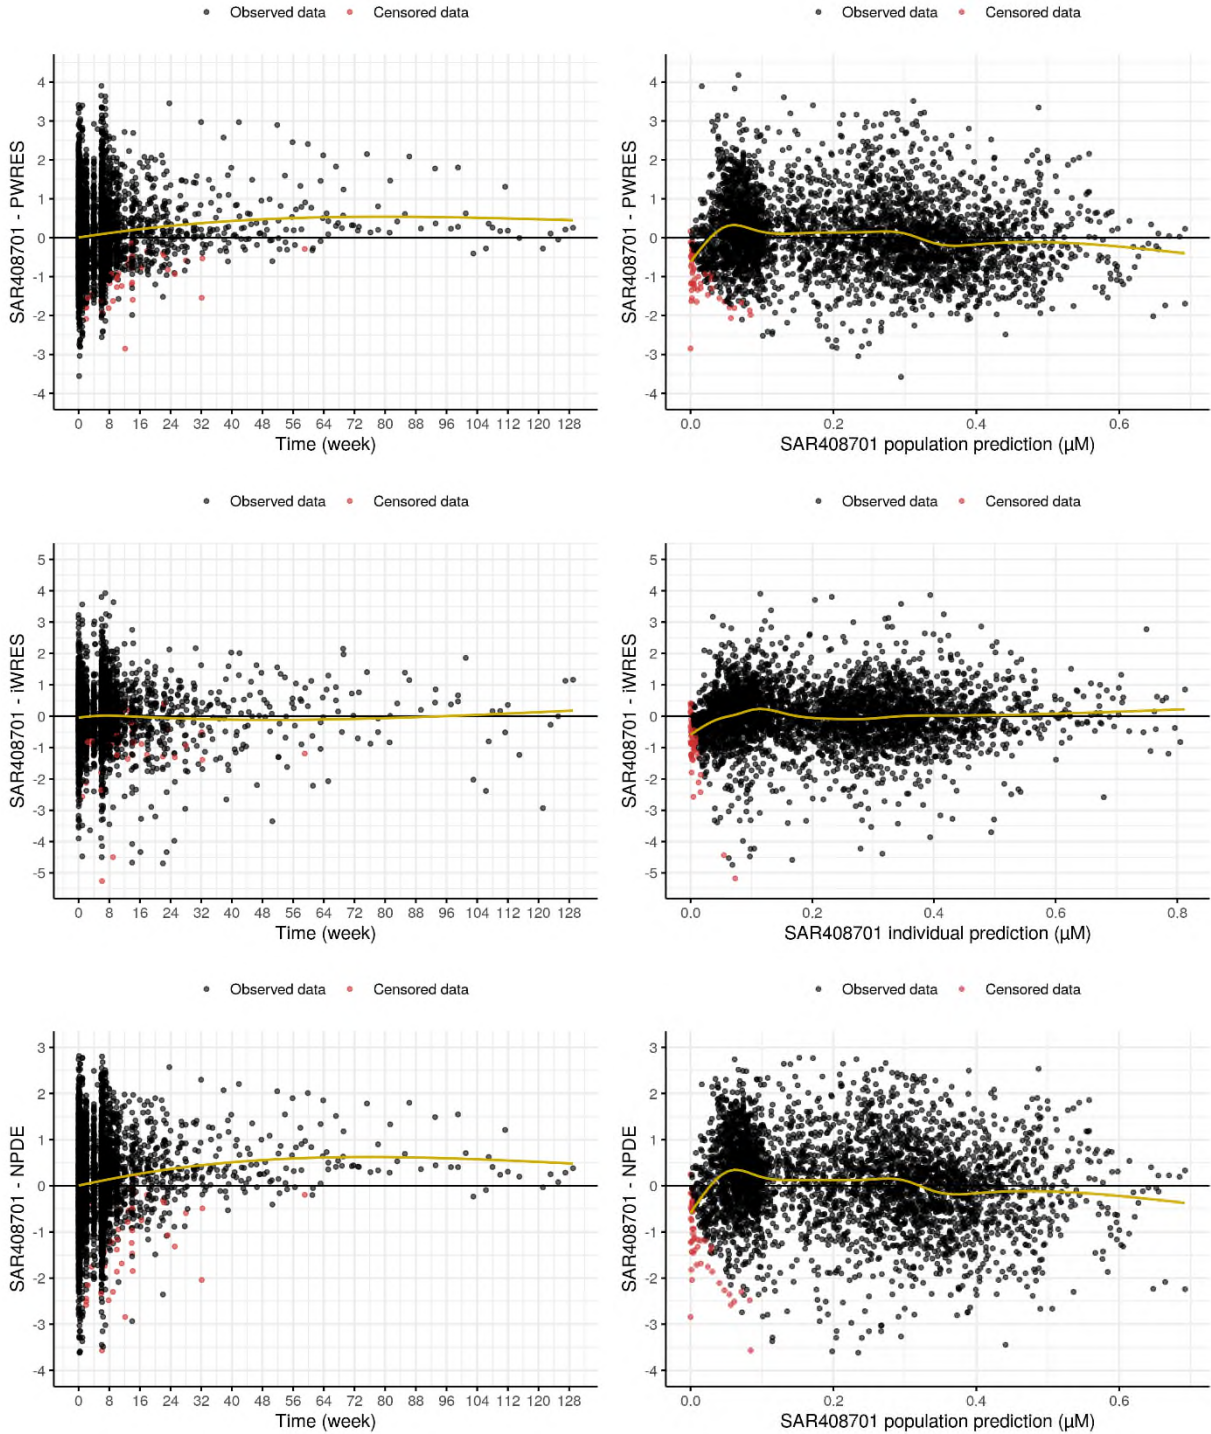

## b. DM4

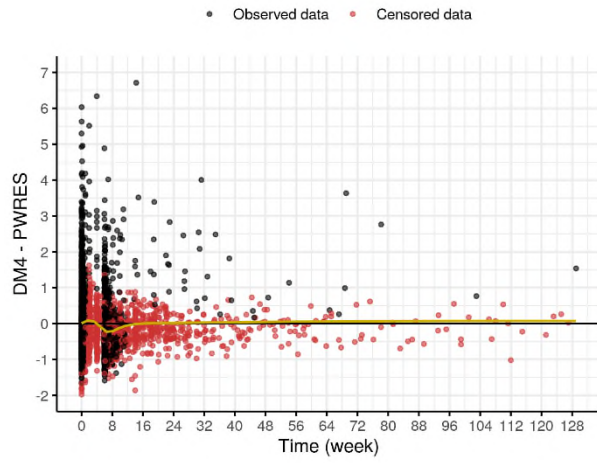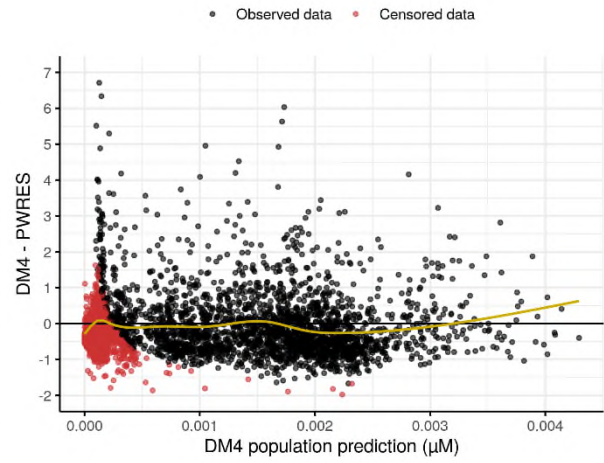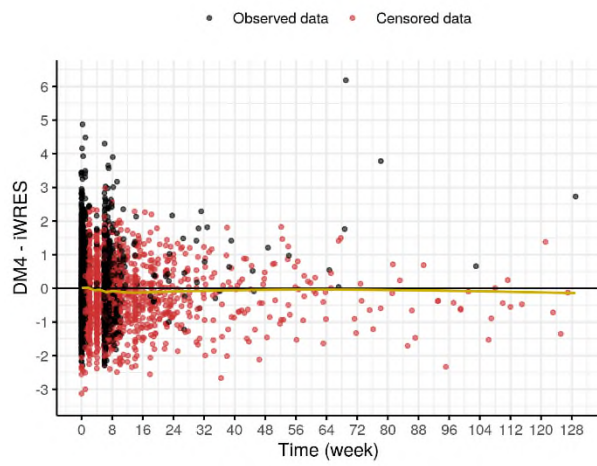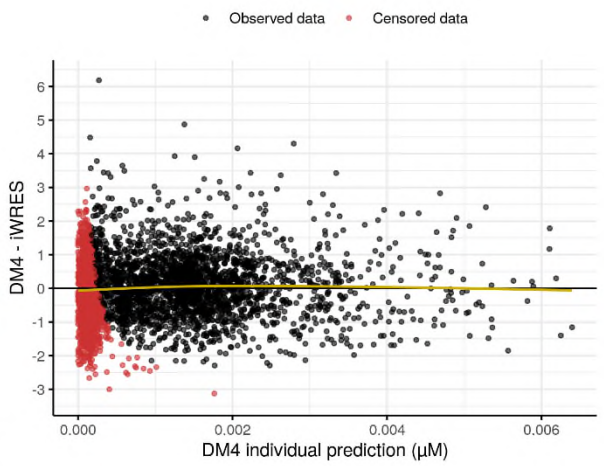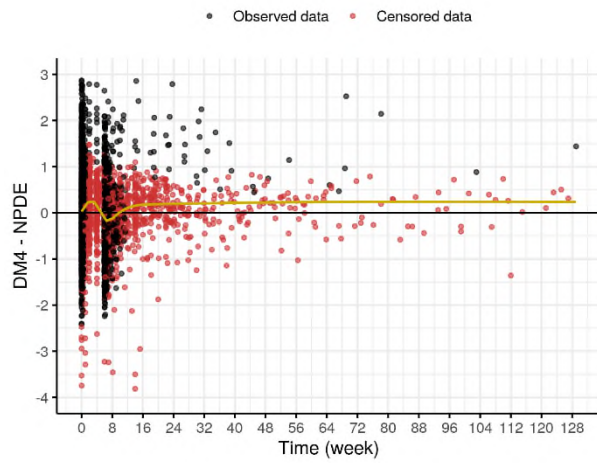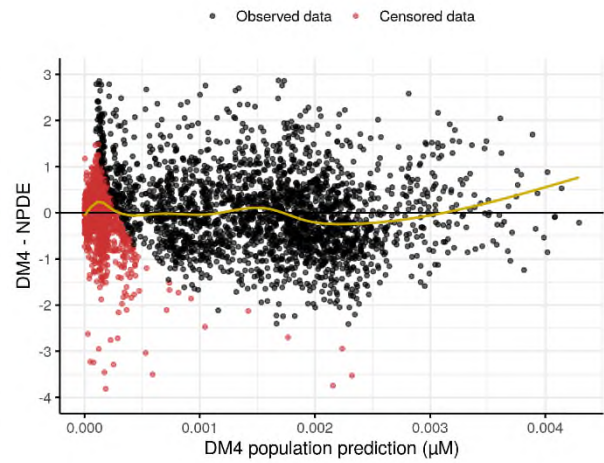

### c. MeDM4

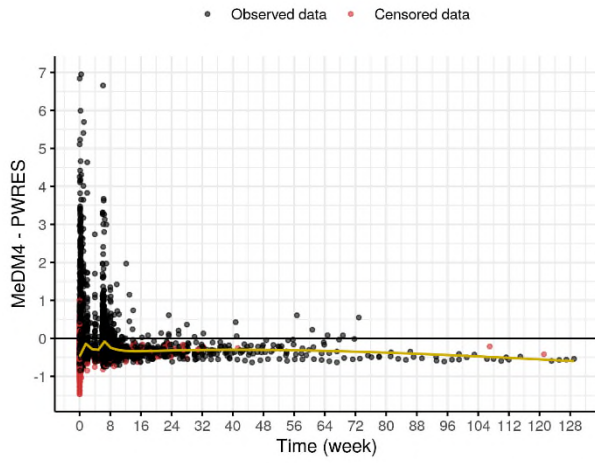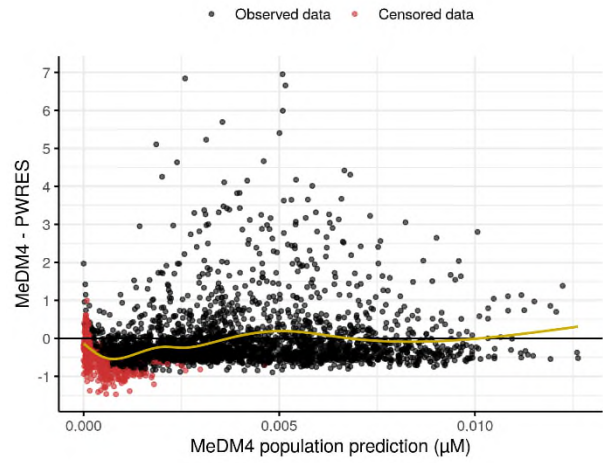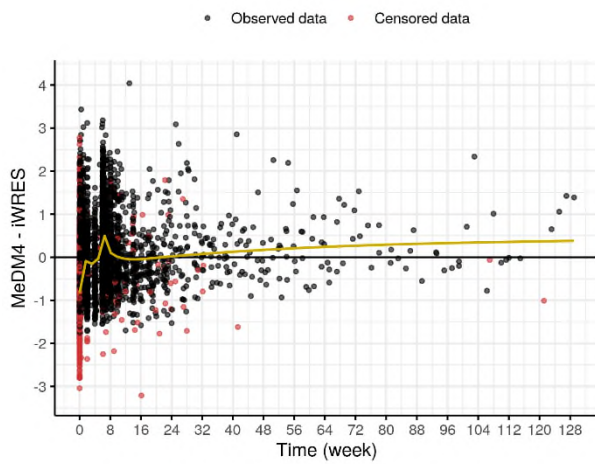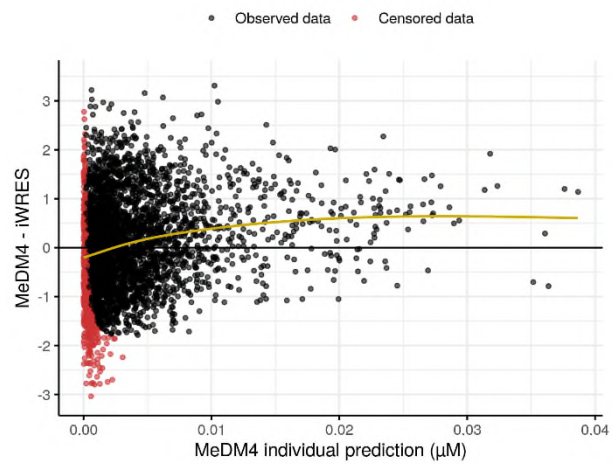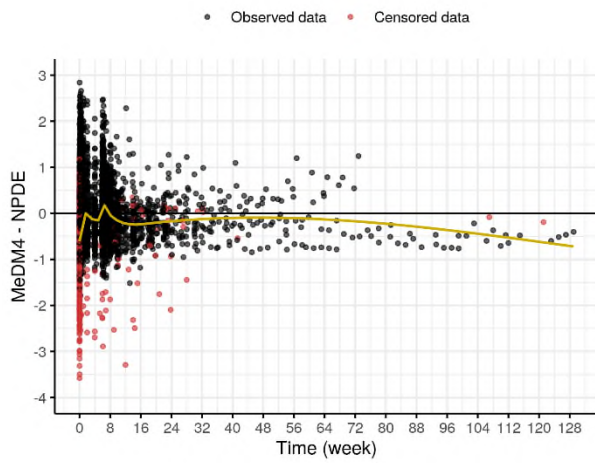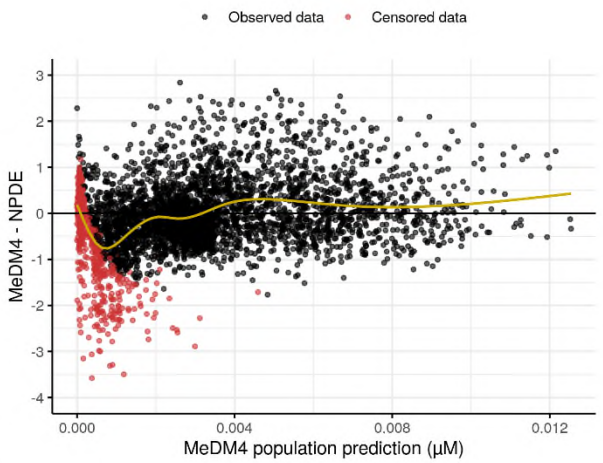

d. NAB

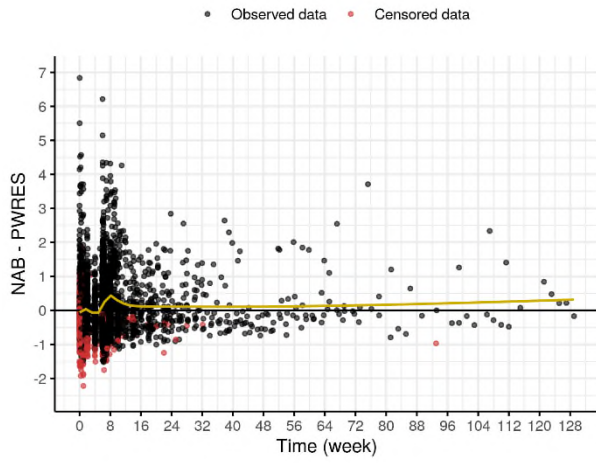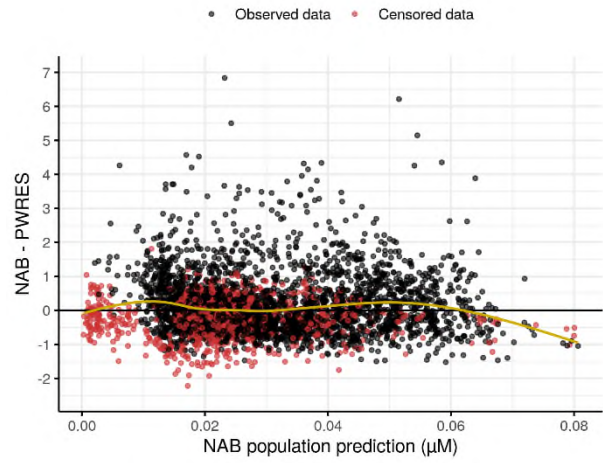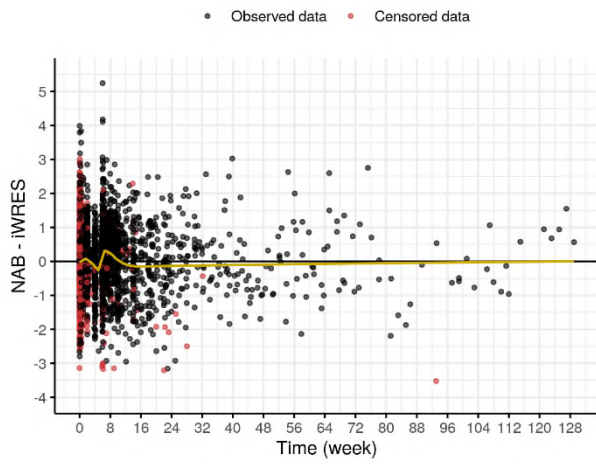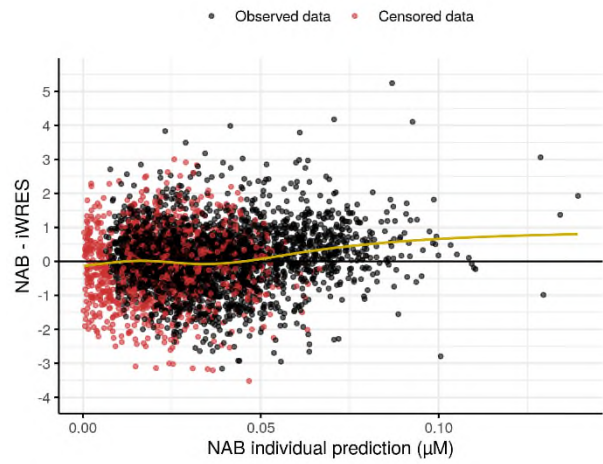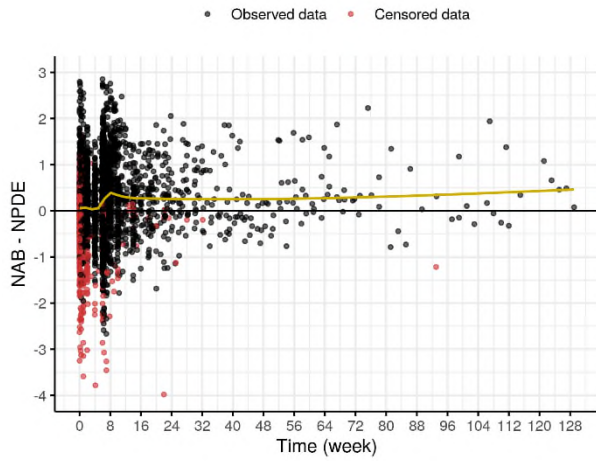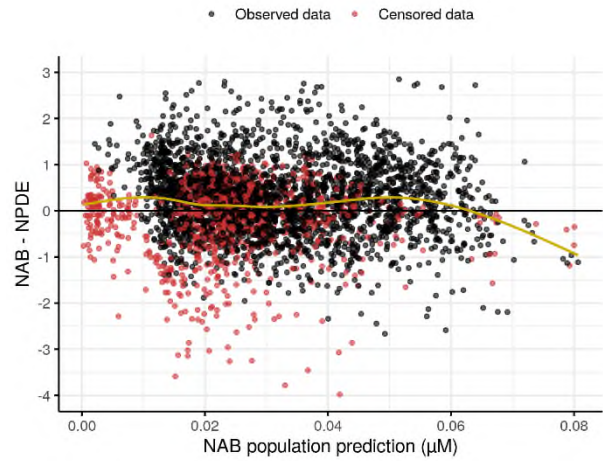

Supplement: 10928_2021_9799_MOESM4_ESM.pdf [file 10928_2021_9799_MOESM4_ESM.pdf]
