# Supplementary material for: Integrated multiple analytes and semi-mechanistic population pharmacokinetic model of tusamitamab ravtansine, a DM4 anti-CEACAM5 antibody-drug conjugate
Source: PubMed Central journal article supplement (PMC9098589; doi:10.1007/s10928-021-09799-0), 2022-02-15
Supplement: 10928_2021_9799_MOESM1_ESM.pdf [file 10928_2021_9799_MOESM1_ESM.pdf]

Integrated multiple analytes and semi-mechanistic population pharmacokinetic model of tusamitamab ravtansine, a DM4 anti-CEACAM5 antibody-drug conjugate

*Journal of Pharmacokinetics and Pharmacodynamics*

Clemence Pouzin, Leonid Gibiansky, Nathalie Fagniez, Michel Tod, Mustapha Chadjaa, Laurent Nguyen

Corresponding author: Clemence Pouzin, 1 Avenue Pierre Brossolette, 91380 Chilly-Mazarin, France. Email:

[Clemence.Pouzin@sanofi.fr](mailto:Clemence.Pouzin@sanofi.fr)

## Supplemental material 1: Monolix model (.mlxtran)

```
[LONGITUDINAL]
input = {FR_DAR7, FR_DAR6, FR_DAR5, FR_DAR4, FR_DAR3, FR_DAR2, FR_DAR1, FR_NAB, CL_ADC, VC, Q,
VP, L6, L5, L4, L3, L2, k_dec1, CL_NAB, CL_DM4, CL_MeDM4, FR_MeDM4, V_DM4, V_MeDM4}
```

EQUATION:

```
;-----
; DAR input fractions
;-----
SUM = 1 + FR_DAR1 + FR_DAR2 + FR_DAR3 + FR_DAR4 + FR_DAR5 + FR_DAR6 + FR_DAR7 + FR_NAB
F_DAR8 = 1/SUM
F_DAR7 = FR_DAR7/SUM
F_DAR6 = FR_DAR6/SUM
F_DAR5 = FR_DAR5/SUM
F_DAR4 = FR_DAR4/SUM
F_DAR3 = FR_DAR3/SUM
F_DAR2 = FR_DAR2/SUM
F_DAR1 = FR_DAR1/SUM
F_NAB = FR_NAB /SUM
```

PK:

```
compartment(cmt=1, amount=A1, concentration = C_ADC8c, volume = VC)
compartment(cmt=2, amount=A2, concentration = C_ADC8p, volume = VP)
compartment(cmt=3, amount=A3, concentration = C_ADC7c, volume = VC)
compartment(cmt=4, amount=A4, concentration = C_ADC7p, volume = VP)
compartment(cmt=5, amount=A5, concentration = C_ADC6c, volume = VC)
compartment(cmt=6, amount=A6, concentration = C_ADC6p, volume = VP)
compartment(cmt=7, amount=A7, concentration = C_ADC5c, volume = VC)
compartment(cmt=8, amount=A8, concentration = C_ADC5p, volume = VP)
compartment(cmt=9, amount=A9, concentration = C_ADC4c, volume = VC)
compartment(cmt=10, amount=A10, concentration = C_ADC4p, volume = VP)
compartment(cmt=11, amount=A11, concentration = C_ADC3c, volume = VC)
compartment(cmt=12, amount=A12, concentration = C_ADC3p, volume = VP)
compartment(cmt=13, amount=A13, concentration = C_ADC2c, volume = VC)
compartment(cmt=14, amount=A14, concentration = C_ADC2p, volume = VP)
compartment(cmt=15, amount=A15, concentration = C_ADC1c, volume = VC)
compartment(cmt=16, amount=A16, concentration = C_ADC1p, volume = VP)
compartment(cmt=17, amount=A17, concentration = C_NABc, volume = VC)
compartment(cmt=18, amount=A18, concentration = C_NABp, volume = VP)
compartment(cmt=19, amount=A19, concentration = C_DM4, volume = V_DM4)
compartment(cmt=20, amount=A20, concentration = C_MeDM4, volume = V_MeDM4)
iv(cmt = 1, p = F_DAR8)
iv(cmt = 3, p = F_DAR7)
iv(cmt = 5, p = F_DAR6)
iv(cmt = 7, p = F_DAR5)
iv(cmt = 9, p = F_DAR4)
iv(cmt = 11, p = F_DAR3)
iv(cmt = 13, p = F_DAR2)
iv(cmt = 15, p = F_DAR1)
iv(cmt = 17, p = F_NAB)
```

EQUATION:

odeType=stiff

```
;-----
; Constant definition
;-----
k12 = Q/VC
k21 = Q/VP
k34 = Q/VC
k43 = Q/VP
k56 = Q/VC
k65 = Q/VP
k78 = Q/VC
k87 = Q/VP
k9_10 = Q/VC
k10_9 = Q/VP
k11_12 = Q/VC
k12_11 = Q/VP
k13_14 = Q/VC
k14_13 = Q/VP
k15_16 = Q/VC
k16_15 = Q/VP
k17_18 = Q/VC
k18_17 = Q/VP
k10 = CL_ADC/VC
k30 = CL_ADC/VC
k50 = CL_ADC/VC
k70 = CL_ADC/VC
k90 = CL_ADC/VC
k11_0 = CL_ADC/VC
k13_0 = CL_ADC/VC
k15_0 = CL_ADC/VC
k17_0 = CL_NAB/VC
k19_0 = CL_DM4/V_DM4
k20_0 = CL_MeDM4/V_MeDM4
```

```

;-----
; Deconjugation
;-----
k_dec8 = k_dec1 * L6
k_dec7 = k_dec1 * L6
k_dec6 = k_dec1 * L6
k_dec5 = k_dec1 * L5
k_dec4 = k_dec1 * L4
k_dec3 = k_dec1 * L3
k_dec2 = k_dec1 * L2

k13 = k_dec8
k35 = k_dec7
k57 = k_dec6
k79 = k_dec5
k9_11 = k_dec4
k11_13 = k_dec3
k13_15 = k_dec2
k15_17 = k_dec1

;-----
; ODE and initial conditions
;-----

A1_0 = 0
A2_0 = 0
A3_0 = 0
A4_0 = 0
A5_0 = 0
A6_0 = 0
A7_0 = 0
A8_0 = 0
A9_0 = 0
A01_0 = 0

A11_0 = 0
A12_0 = 0
A13_0 = 0
A14_0 = 0
A15_0 = 0
A16_0 = 0
A17_0 = 0
A18_0 = 0
A19_0 = 0
A20_0 = 0

ddt_A1 = -(k10+k12)*A1 - k13*A1 + k21*A2 ;DAR8 CENTRAL
ddt_A2 = k12*A1-k21*A2 ;DAR8 PERIPHERAL

ddt_A3 = k13*A1 - (k30+k12)*A3 - k35*A3 + k21*A4 ;DAR7 CENTRAL
ddt_A4 = k12*A3-k21*A4 ;DAR7 PERIPHERAL

ddt_A5 = k35*A3 - (k50+k12)*A5 - k57*A5 + k21*A6 ;DAR6 CENTRAL
ddt_A6 = k12*A5-k21*A6 ;DAR6 PERIPHERAL

ddt_A7 = k57*A5 - (k70+k12)*A7 - k79*A7 + k21*A8 ;DAR5 CENTRAL
ddt_A8 = k12*A7-k21*A8 ;DAR5 PERIPHERAL

ddt_A9 = k79*A7 - (k90+k12)*A9 - k9_11*A9 + k21*A10 ;DAR4 CENTRAL
ddt_A10 = k12*A9-k21*A10 ;DAR4 PERIPHERAL

ddt_A11 = k9_11*A9 - (k11_0+k12)*A11 - k11_13*A11 + k21*A12 ;DAR3 CENTRAL
ddt_A12 = k12*A11-k21*A12 ;DAR3 PERIPHERAL

ddt_A13 = k11_13*A11 - (k13_0+k12)*A13 - k13_15*A13 + k21*A14 ;DAR2 CENTRAL
ddt_A14 = k12*A13-k21*A14 ;DAR2 PERIPHERAL

ddt_A15 = k13_15*A13 - (k15_0+k12)*A15 - k15_17*A15 + k21*A16 ;DAR1 CENTRAL
ddt_A16 = k12*A15-k21*A16 ;DAR1 PERIPHERAL

ddt_A17 = k15_17*A15 - (k17_0+k12)*A17 + k21*A18 ;DAR0 CENTRAL
ddt_A18 = k12*A17-k21*A18 ;DAR0 PERIPHERAL

input_1 = k_dec8*A1 + k_dec7*A3 + k_dec6*A5 + k_dec5*A7 + k_dec4*A9 + k_dec3*A11 + k_dec2*A13 +
k_dec1*A15
ddt_A19 = input_1 - k19_0*A19 ;DM4 CENTRAL
ddt_A20 = FR_MeDM4 * k19_0*A19 - k20_0*A20 ;MEDM4 CENTRAL

;-----
; ENTITIES FIT
;-----
C_ADC = C_ADC8c + C_ADC7c + C_ADC6c + C_ADC5c + C_ADC4c + C_ADC3c + C_ADC2c + C_ADC1c
C_TAB = C_ADC+C_NABc
DM4tot = 8*C_ADC8c + 7*C_ADC7c + 6*C_ADC6c + 5*C_ADC5c + 4*C_ADC4c + 3*C_ADC3c + 2*C_ADC2c +
1*C_ADC1c
DAR = DM4tot/C_TAB

prop_ADC8 = 100*C_ADC8c/C_TAB
prop_ADC7 = 100*C_ADC7c/C_TAB
prop_ADC6 = 100*C_ADC6c/C_TAB
prop_ADC5 = 100*C_ADC5c/C_TAB
prop_ADC4 = 100*C_ADC4c/C_TAB

prop_ADC3 = 100*C_ADC3c/C_TAB
prop_ADC2 = 100*C_ADC2c/C_TAB
prop_ADC1 = 100*C_ADC1c/C_TAB
prop_NAB = 100*C_NABc /C_TAB

OUTPUT:
output = {C_ADC, C_DM4, C_MeDM4, C_NABc, DAR, prop_ADC8, prop_ADC7, prop_ADC6, prop_ADC5,
prop_ADC4, prop_ADC3, prop_ADC2, prop_ADC1, prop_NAB}

```
