# Supplementary material for: Integrated multiple analytes and semi-mechanistic population pharmacokinetic model of tusamitamab ravtansine, a DM4 anti-CEACAM5 antibody-drug conjugate
Source: PubMed Central journal article supplement (PMC9098589; doi:10.1007/s10928-021-09799-0), 2022-02-15

Integrated multiple analytes and semi-mechanistic population pharmacokinetic model of tusamitamab ravtansine, a DM4 anti-CEACAM5 antibody-drug conjugate

*Journal of Pharmacokinetics and Pharmacodynamics*

Clemence Pouzin, Leonid Gibiansky, Nathalie Fagniez, Michel Tod, Mustapha Chadjaa, Laurent Nguyen

Corresponding author: Clemence Pouzin, 1 Avenue Pierre Brossolette, 91380 Chilly-Mazarin, France. Email: [Clemence.Pouzin@sanofi.fr](mailto:Clemence.Pouzin@sanofi.fr)

# Online Resource 2: Spaghetti plots

a. SAR408701, DM4, MeDM4 and NAB at cycle 1

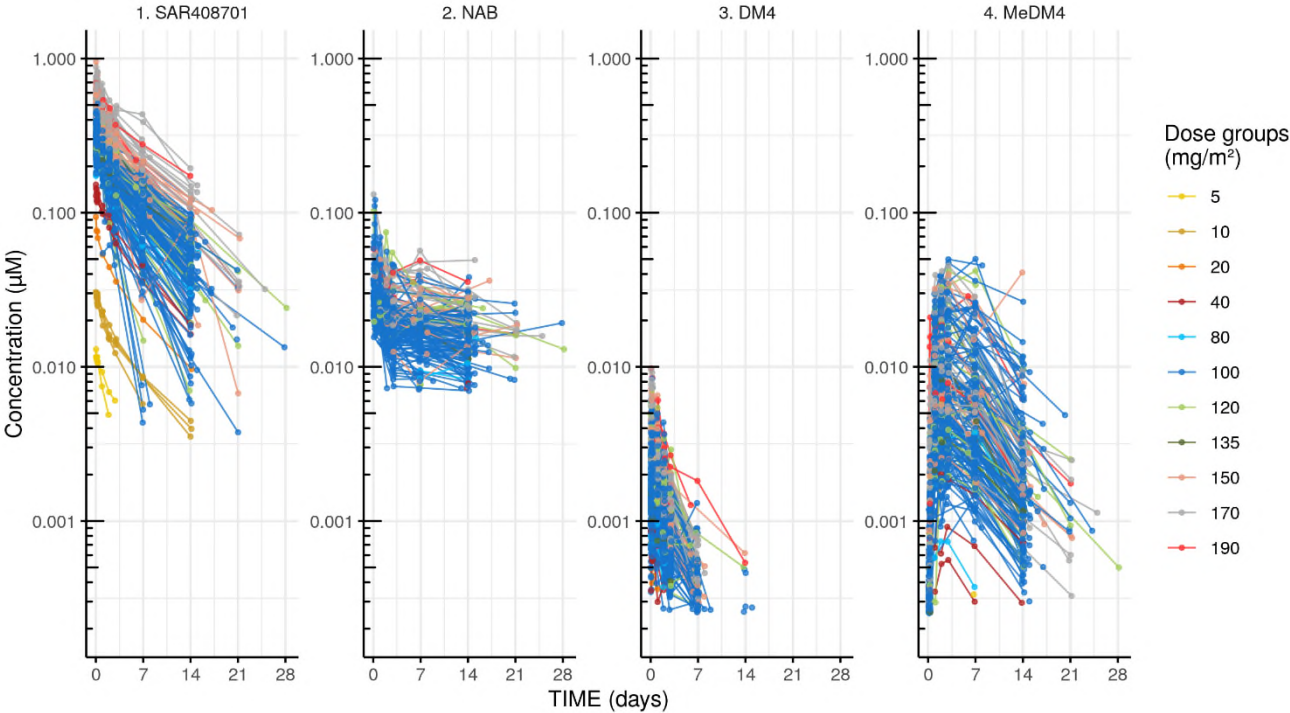

b. Average DAR data at cycle 1 and cycle 4.

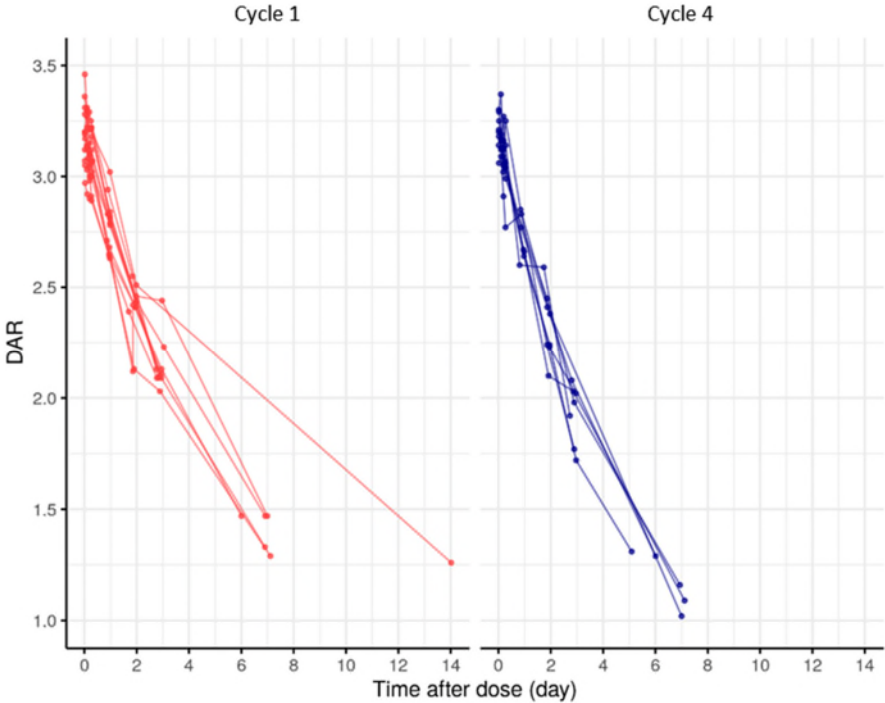

c. Proportions of individual DAR species at cycle 1 and cycle 4

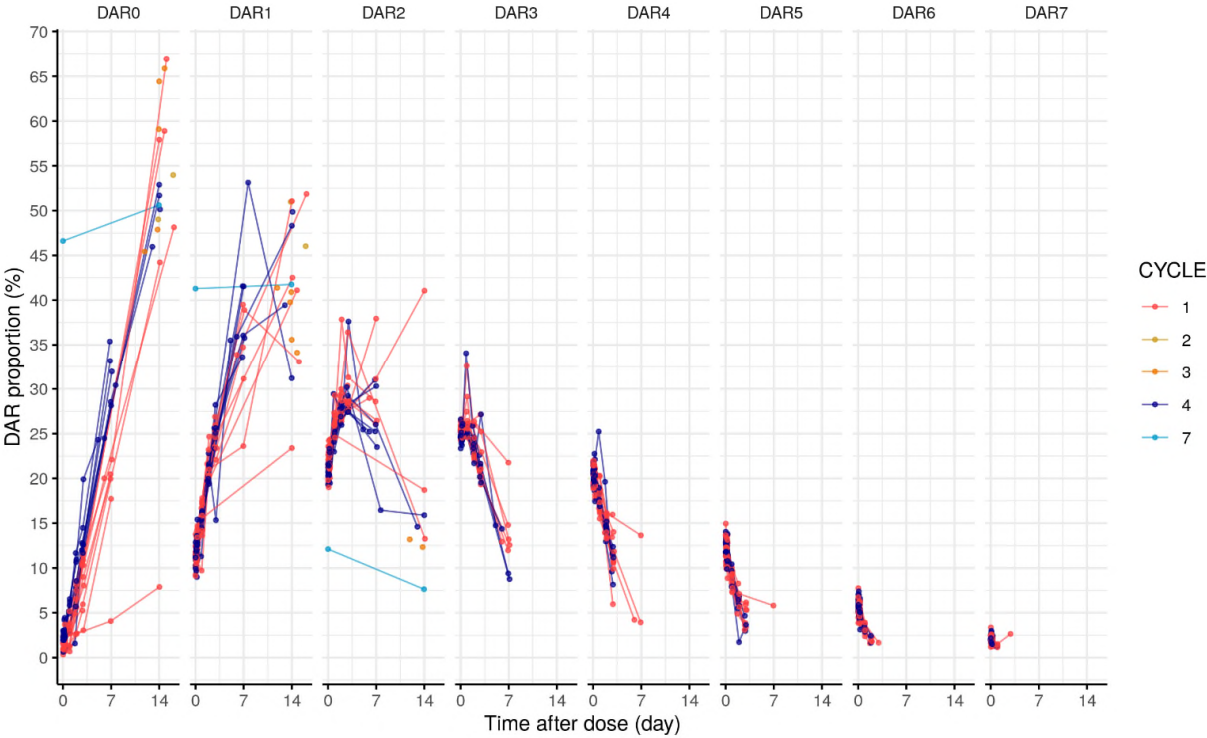

Supplement: 10928_2021_9799_MOESM2_ESM.pdf [file 10928_2021_9799_MOESM2_ESM.pdf]
